# Supplementary material for: Transcriptome analyses of rhesus monkey preimplantation embryos reveal a reduced capacity for DNA double-strand break repair in primate oocytes and early embryos
Source: HighWire-hosted journal article supplement (doi:10.1101/gr.198044.115), 2017-02-21
Supplement: Supplemental_Table_S1.docx [file Supplemental_Table_S1.docx]

**Supplemental_Table_S1**. The numbers of sequencing reads and genes detected in each sample.

| Batch | Stage | | No. of embryo | | Total  Reads | | Mapped  Reads | | Mapping  Ratio | | No. of gene |
| --- | --- | --- | --- | --- | --- | --- | --- | --- | --- | --- | --- |
| Single | | GV-K-1 | | 1 | | 11403612 | | 9945712 | | 85.4 | 9925 |
| Single | | GV-K-2 | | 1 | | 11370740 | | 9869801 | | 84.8 | 9482 |
| Single | | GV-L-3 | | 1 | | 11581245 | | 9907732 | | 83.1 | 9268 |
| Single | | MII-K-1 | | 1 | | 12731906 | | 11240969 | | 86.6 | 7675 |
| Single | | MII-K-2 | | 1 | | 7931132 | | 7139950 | | 88.6 | 7588 |
| Single | | MII-K-3 | | 1 | | 9405239 | | 8161622 | | 85.4 | 7690 |
| Single | | PN-K-1 | | 1 | | 8761083 | | 7998974 | | 90.3 | 8626 |
| Single  Single  Single  Single  Single  Single  Single  Single  Single  Single  Single  Single  Single  Single  Single  Single  Single  Single  Single  Pooled  Pooled  Pooled  Pooled  Pooled  Pooled  Pooled  Pooled | | PN-K-2  PN-N-3  2C-L-1  2C-L-2  2C-L-3  4C-K-2  4C-L-3  8C-K-1  8C-K-2  8C-K-3  8C-L-4  8C-L-6  MOR-L-1  MOR-L-2  MOR-M-3  BLA-M-1  BLA-M-2  BLA-M-3  BLA-M-4  GV  MII  PN  2-Cell  4-Cell  8-Cell  Morula  Blastocyst | | 1  1  1  1  1  1  1  1  1  1  1  1  1  1  1  1  1  1  1  20  21  5  21  20  23  20  20 | | 10837853  11298353  8024160  9351843  12997043  9168085  7455613  9685939  9426488  11055570  7296752  9385901  9986762  10336426  7636165  12374259  8989180  14551124  12856163  31785881  27061841  18753118  30277606  29576167  30288379  30076254  30493734 | | 9463438  9559215  7084576  8283704  11480021  8214520  6542751  8497913  8454107  9502344  6527662  8310260  8695037  8864713  6319022  9837008  7258134  11878812  10561506  27630547  19492144  14223178  23751126  21301002  22979329  22914972  23406084 | | 85.4  83.0  86.6  86.9  86.8  88.2  86.0  86.2  88.2  84.3  88.0  87.2  83.9  82.5  79.8  76.8  77.7  78.6  79.3  87.4  72.3  76.2  78.3  72.4  76.3  76.4  77.1 | 8717  7804  9013  9052  8922  9594  9135  9940  9506  9895  9258  8430  9293  8662  8552  9078  9066  9342  9095  7119  4725  7520  8255  8217  9998  7774  6302 |
